# Supplementary material
Source: PubMed Central journal article supplement (PMC2928132)
Supplement: ddq277_1.pdf [file ddq277_1.pdf]

## **Supplemental Figure Legends**

**Supplemental Figure 1.** Pyknotic nuclear clumps in MDAFr<sub>t</sub>TA/TRECUGBP1 (+dox, 2 weeks) mice. Hematoxylin and eosin staining of gastrocnemius muscle cross-section showing a myofiber with a nuclear clump (arrow). Scale bar indicates 50  $\mu$ m.

**Supplemental Figure 2.** No fiber type switching in induced MDAFr<sub>t</sub>TA/TRECUGBP1 mice. Immunohistochemistry for slow twitch myosin heavy chain (MHC) and fast twitch MHC on gastrocnemius muscle cross-sections over the eight week time course on dox diet. 5X magnification.

**Supplemental Figure 3.** Two-fold up-regulation of CUGBP1 in MDAFr<sub>t</sub>TA/TRECUGBP1 muscle is not sufficient to induce splicing misregulation. Induced adult mice (open bars, n = 3) have no significant changes in splicing compared to uninduced adult control mice (closed bars, n = 3).

**Supplemental Movie 1.** MDAFr<sub>t</sub>TA/TRECUGBP1 (+dox, 2 weeks) mice show impaired movement with abnormal gait, hunched back, and ruffled fur.

**Supplemental Table 1.** Sequence of the forward and reverse primer pairs used for RT-PCR analysis of the indicated alternative splicing events.

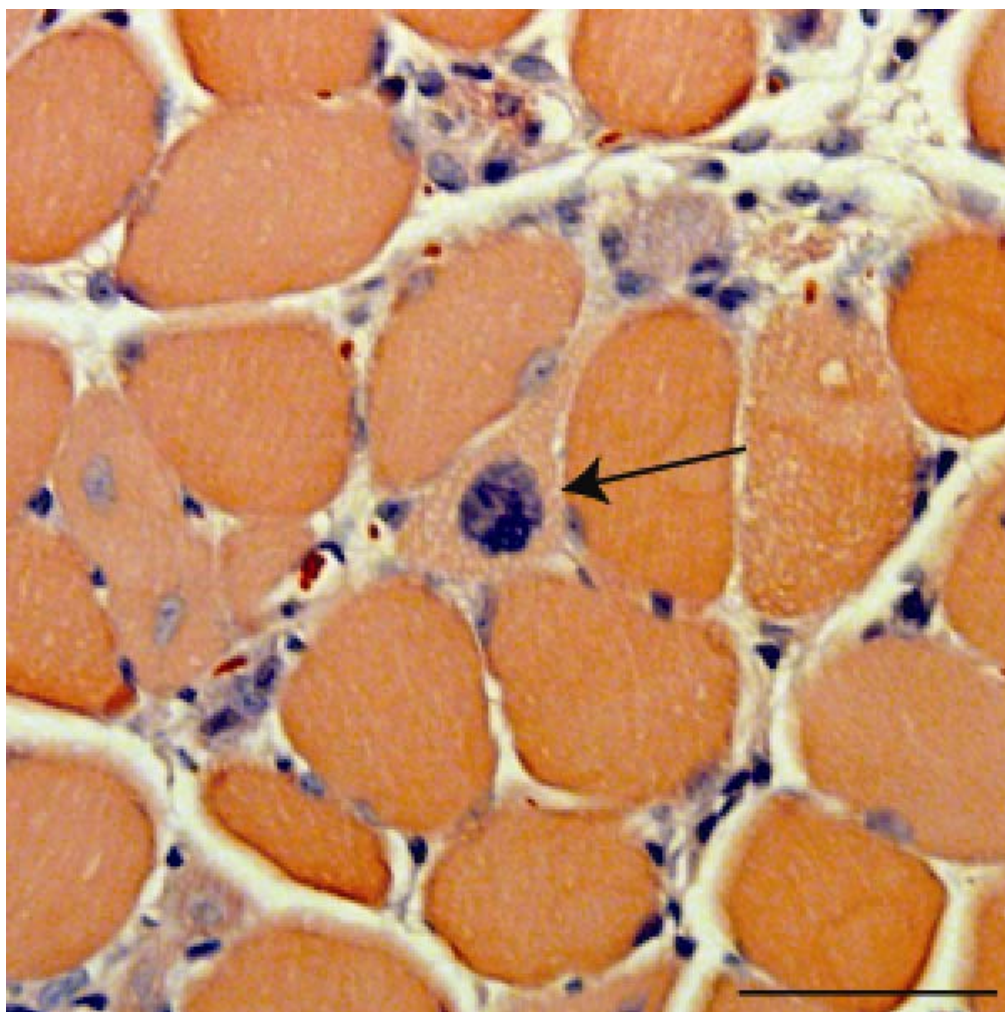

**Figure S1**

i

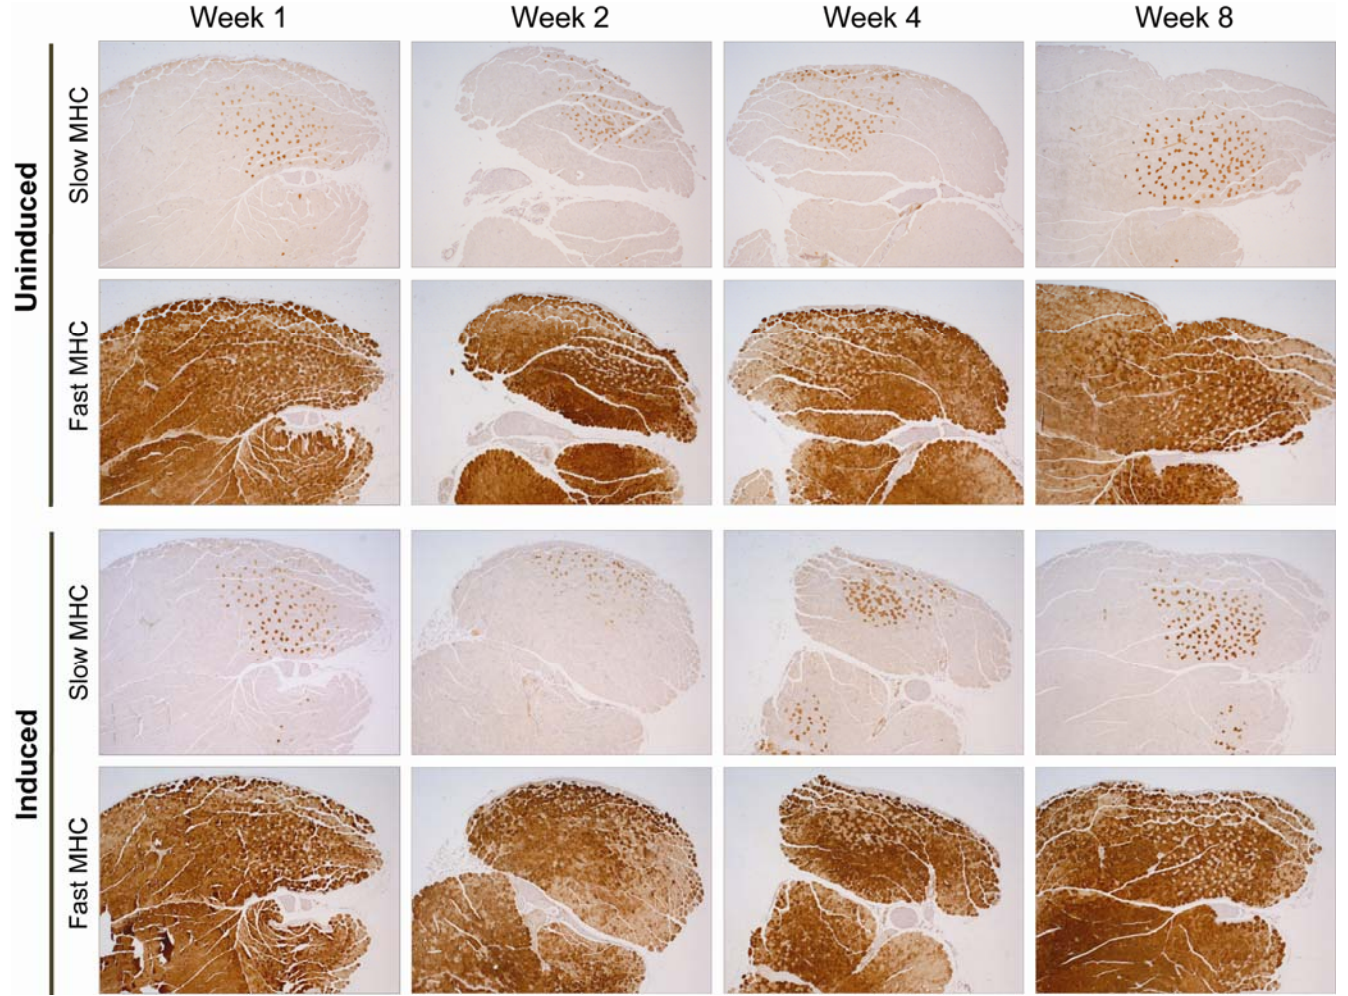

**Figure S2**

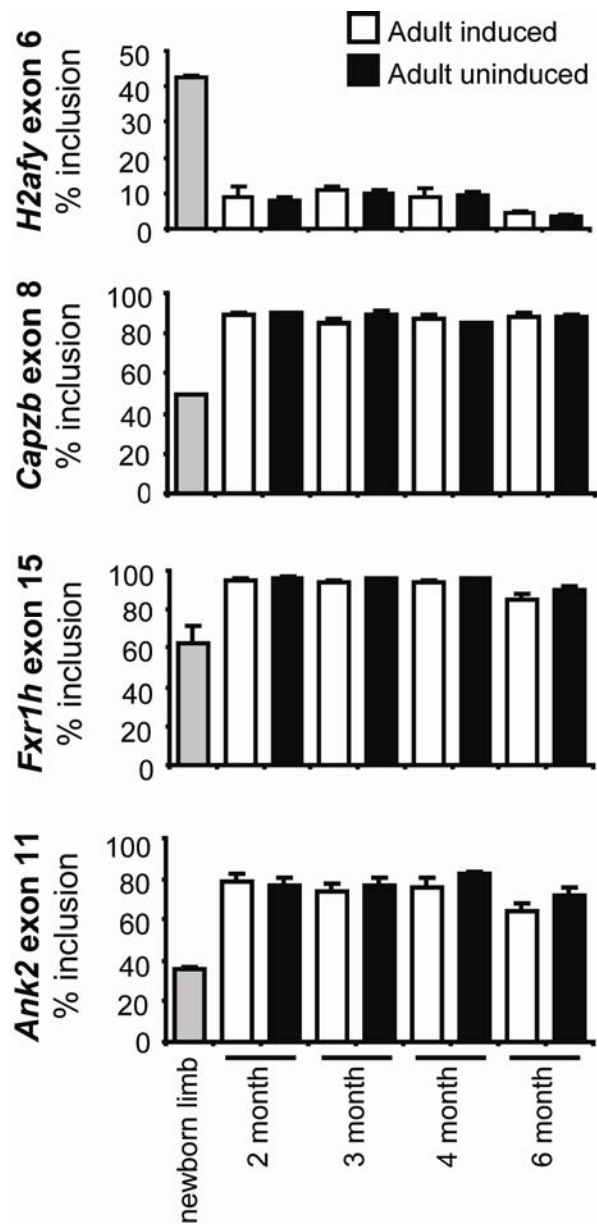

Figure S3

**Supplemental Table 1:**

|                           | <b>Forward primer</b>    | <b>Reverse primer</b>     |
|---------------------------|--------------------------|---------------------------|
| <b>Alp exon 5a/5b</b>     | AGCTGCCAACCTGTGTCCTG     | GATCCTGCAGCACCCCTGAAG     |
| <b>Ank2 exon 22</b>       | GAACGTGGTTCTCCGATTGT     | CGTCTCTGGGGGTATGTCAG      |
| <b>Capn3 exon 16</b>      | CACGGGAATAAGCAACACCTG    | GGACATTCTTGAGTTCATCTGCAC  |
| <b>Capzb exon 8</b>       | GCACGCTGAATGAGATCTACTTTG | CCGGTTAGCGTGAAGCAGAG      |
| <b>Clcn1 exon 7a</b>      | GCTGCTGTCCTCAGCAAGTT     | CTGAATGTGGCTGCAAAGAA      |
| <b>Cypher exon 11</b>     | GGAAGATGAGGCTGATGAGTGG   | TGCTGACAGTGGTAGTGCTCTTTC  |
| <b>Dystrophin exon 78</b> | TGGTTGGCAGTCAAACCTTCA    | TCATCTGCCATGTGGAAAAG      |
| <b>Fhos exon 11a</b>      | CGCCTACAAATCCAGCCTTC     | TCCCTTGTGCCTGATGATCC      |
| <b>Fxr1h exon 15</b>      | GATAATACAGAATCCGATCAG    | CTGAAGGACCATGCTCTTCAATCAC |
| <b>Gfat exon 10</b>       | TCTCTTGATTGGTGTGCGGAG    | TGCTGCAACATCATCATCTTCC    |
| <b>H2afy exon 6</b>       | GACGGCTTCACTGTCCTCTC     | GCCCTTCTTCTCCAGTGTGT      |
| <b>Mbnl1 exon 5</b>       | GCTGCCCAATACCAGGTCAAC    | TGGTGGGAGAAATGCTGTATGC    |
| <b>Mtmr1 exon 2.2</b>     | CATGTTGAATGGTGTAAACAG    | AATTATCCCATGGCTCTGT       |
| <b>Nrap exon 12</b>       | AATACCGGCAGGACTTCCATAAG  | TAGCCAGGCTGCCAACTTTG      |
| <b>Ryr1 exon 70</b>       | GACAATAAGAGCAAAATGGC     | CTTGGTGCGTTCCTGATCTG      |
| <b>Serca1 exon 22</b>     | GCTCATGGTCCTCAAGATCTCAC  | GGGTCAGTGCCTCAGCTTTG      |
| <b>Sorbs1 exon 23</b>     | GGAGACGGCACGATGATAA      | AAACAACGTCTCCCTTCTGC      |
| <b>m-Titin exon 5</b>     | GTGTGAGTCGCTCCAGAAACG    | CCACCACAGGACCATGTTATTTTC  |
| <b>z-Titin exon 4</b>     | TGTTGCGACTGTCGTTGCTG     | TCCACATGCGTAGGCTCTCTG     |

**Supplemental Table 1.** Sequence of the forward and reverse primer pairs used for RT-PCR analysis of the indicated alternative splicing events.
